# Supplementary material for: An Interesting Conversion Route of Mononuclear Zinc Complex to Zinc Mixed Carboxylate Coordination Polymer
Source: MDPI journal article supplement (doi:10.3390/molecules28052011), 2023-02-21
Supplement: s1 [file s1]

# An interesting conversion route from mononuclear zinc complex to zinc coordination polymer

Gina Vasile Scăețeanu , Constantin G. Daniliuc , Rodica Olar and Mihaela Badea

**Table S1.** Crystal data and structure refinement for compound (**1a**).

| Empirical formula                           | C <sub>14</sub> H <sub>12</sub> N <sub>2</sub> O <sub>4</sub> Zn |
|---------------------------------------------|------------------------------------------------------------------|
| Formula weight                              | 337.65                                                           |
| Temperature/K                               | 293(2)                                                           |
| Crystal system                              | <i>orthorhombic</i>                                              |
| Space group                                 | <i>Pca</i> 2 <sub>1</sub>                                        |
| a/Å                                         | 10.19420(10)                                                     |
| b/Å                                         | 8.7005(2)                                                        |
| c/Å                                         | 31.1599(4)                                                       |
| Volume/Å <sup>3</sup>                       | 2763.72(8) Å <sup>3</sup>                                        |
| Z                                           | 8                                                                |
| Q <sub>calc</sub> /g/cm <sup>3</sup>        | 1.623                                                            |
| F(000)                                      | 1376                                                             |
| Radiation                                   | MoKα'                                                            |
| Reflections collected                       | 4650                                                             |
| Goodness-of-fit on F <sup>2</sup>           | 1.083                                                            |
| Largest diff. peak/hole / e Å <sup>-3</sup> | -0.302, 0.454                                                    |

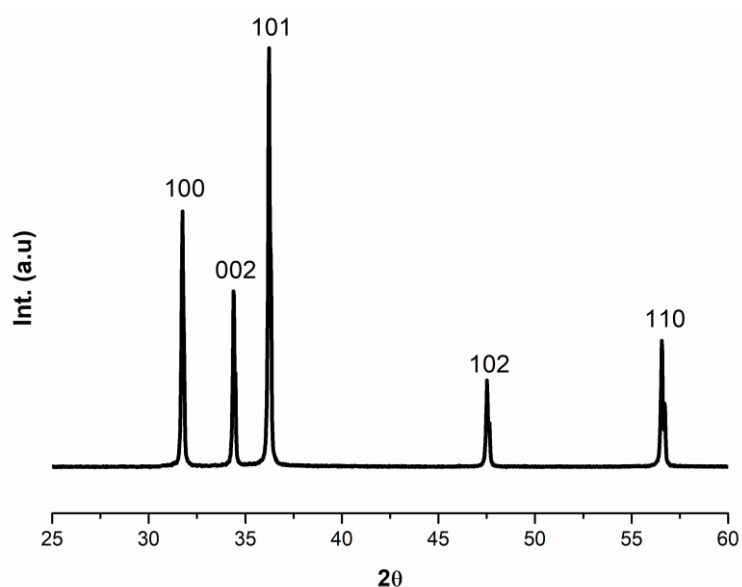

**Figure S1.** Powder X-ray diffractogram for final residue (ZnO) obtained from thermal decomposition of (**1a**).

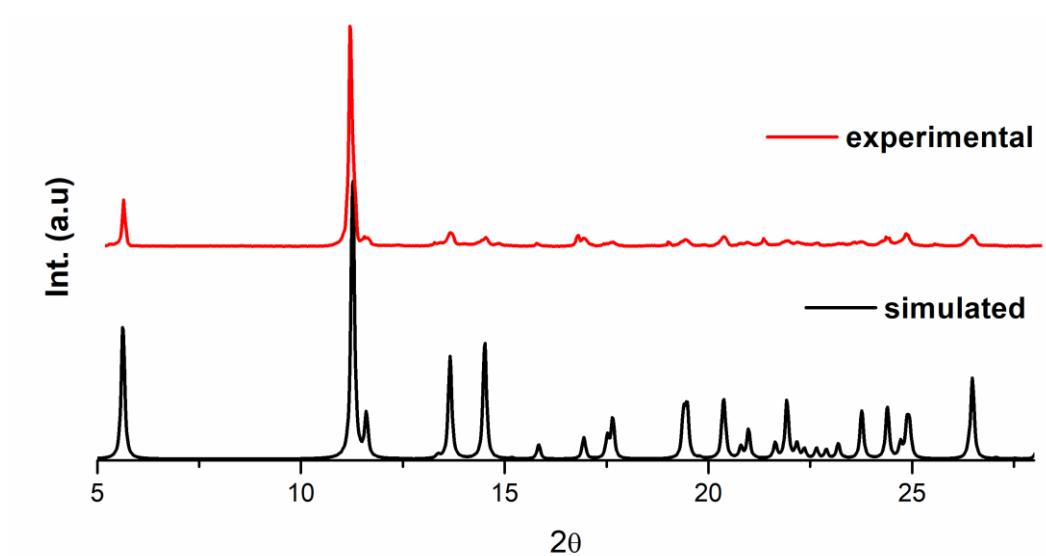

**Figure S2.** Powder X-ray diffractogram for complex (**1a**) (red) and the simulated one from single crystal X-ray data (black).
